# Supplementary material
Source: HighWire-hosted journal article supplement (https://jech.bmj.com/content/77/5/277)
Supplement: inline-supplementary-material-1 [file inline-supplementary-material-1.pdf]

Table S1. Baseline variable definitions in the present study

| Variable       | Questions in the CLHLS questionnaires                         | Options of questions in the CLHLS questionnaires                                                                                   | Reclassifications of options in the CLHLS codes                                                                            | Reclassifications of options in the present study <sup>a</sup>                                                                         |
|----------------|---------------------------------------------------------------|------------------------------------------------------------------------------------------------------------------------------------|----------------------------------------------------------------------------------------------------------------------------|----------------------------------------------------------------------------------------------------------------------------------------|
| Sex: male      |                                                               | 1. male<br>2. female                                                                                                               | 1. male<br>2. female                                                                                                       | • male<br>• female                                                                                                                     |
| Age            | Validated age; also write the evidence for confirming the age | Number                                                                                                                             | Number                                                                                                                     | • actual age                                                                                                                           |
| Education      | How many years did you attend school?                         | Number                                                                                                                             | 88. don't know<br>99. missing                                                                                              | • actual education years<br>• missing: don't know, missing                                                                             |
| Marital status | Current marital status?                                       | 1. married and living with spouse<br>2. separated<br>3. cohabiting with a partner<br>4. divorced<br>5. widowed<br>6. never married | 1. currently married and living with spouse<br>2. separated<br>3. divorced<br>4. widowed<br>5. never married<br>9. missing | • in marriage: currently married and living with spouse, separated<br>• not in marriage: divorced, widowed, never married<br>• missing |
| Residence      | Current residence area of interviewee?                        | 1. city<br>2. town<br>3. rural                                                                                                     | 1. city<br>2. town<br>3. rural                                                                                             | • urban: city, town<br>• rural: rural                                                                                                  |
| Co-residence   | Co-residence?                                                 | 1. with household member(s)<br>2. alone<br>3. in a nursing home                                                                    | 1. with household member(s)<br>2. alone<br>3. in an institution<br>9. missing                                              | • with household member(s)<br>• alone<br>• in a institution<br>• missing                                                               |

|                          |                                                                               |                                                                                           |                                                                                                     |                                                                                                                                                                            |
|--------------------------|-------------------------------------------------------------------------------|-------------------------------------------------------------------------------------------|-----------------------------------------------------------------------------------------------------|----------------------------------------------------------------------------------------------------------------------------------------------------------------------------|
| Household income         | How do you rate your economic status compared with others in your local area? | 1. very rich<br>2. rich<br>3. so so<br>4. poor<br>5. very poor<br>8. didn't answer        | 1. very rich<br>2. richer<br>3. fair<br>4. poorer<br>5. very poor<br>8. didn't answer<br>9. missing | <ul style="list-style-type: none"> <li>rich: very rich, richer</li> <li>fair: fair</li> <li>poor: poorer, very poor</li> <li>missing: didn't answer, missing</li> </ul>    |
| Fresh fruit              | Do you eat fresh fruit?                                                       | 1. everyday or almost everyday<br>2. quite often<br>3. occasionally<br>4. rarely or never | 1. almost everyday<br>2. quite often<br>3. occasionally<br>4. rarely or never<br>9. missing         | <ul style="list-style-type: none"> <li>often: almost everyday, quite often</li> <li>occasionally: occasionally</li> <li>never: rarely or never</li> <li>missing</li> </ul> |
| Fresh vegetable          | Do you eat fresh vegetables?                                                  | 1. everyday or almost everyday<br>2. quite often<br>3. occasionally<br>4. rarely or never | 1. almost everyday<br>2. quite often<br>3. occasionally<br>4. rarely or never<br>9. missing         | <ul style="list-style-type: none"> <li>often: almost everyday, quite often</li> <li>occasionally: occasionally</li> <li>never: rarely or never</li> <li>missing</li> </ul> |
| Current smoking          | Do you smoke at the present time?                                             | 1. yes<br>2. no                                                                           | 1. yes<br>2. no<br>9. missing                                                                       | <ul style="list-style-type: none"> <li>current smoking: yes</li> <li>no smoking at present: no</li> <li>missing</li> </ul>                                                 |
| Current drinking         | Do you drink alcohol at the present time?                                     | 1. yes<br>2. no                                                                           | 1. yes<br>2. no<br>9. missing                                                                       | <ul style="list-style-type: none"> <li>current drinking: yes</li> <li>no drinking at present: no</li> <li>missing</li> </ul>                                               |
| Current regular exercise | Do you do exercises regularly at present?                                     | 1. yes<br>2. no                                                                           | 1. yes<br>2. no<br>9. missing                                                                       | <ul style="list-style-type: none"> <li>current regular exercise: yes</li> <li>no regular exercise at present: no</li> <li>missing</li> </ul>                               |

|                         |                                      |                                  |                                                |                                                                                                                                  |
|-------------------------|--------------------------------------|----------------------------------|------------------------------------------------|----------------------------------------------------------------------------------------------------------------------------------|
| Hypertension            | Are you suffering from this disease? | 1. yes<br>2. no<br>3. don't know | 1. yes<br>2. no<br>3. don't know<br>9. missing | <ul style="list-style-type: none"> <li>• yes: yes</li> <li>• no: no</li> <li>• unknown: don't know</li> <li>• missing</li> </ul> |
| Diabetes                | Are you suffering from this disease? | 1. yes<br>2. no<br>3. don't know | 1. yes<br>2. no<br>3. don't know<br>9. missing | <ul style="list-style-type: none"> <li>• yes: yes</li> <li>• no: no</li> <li>• unknown: don't know</li> <li>• missing</li> </ul> |
| Heart disease           | Are you suffering from this disease? | 1. yes<br>2. no<br>3. don't know | 1. yes<br>2. no<br>3. don't know<br>9. missing | <ul style="list-style-type: none"> <li>• yes: yes</li> <li>• no: no</li> <li>• unknown: don't know</li> <li>• missing</li> </ul> |
| Cerebrovascular disease | Are you suffering from this disease? | 1. yes<br>2. no<br>3. don't know | 1. yes<br>2. no<br>3. don't know<br>9. missing | <ul style="list-style-type: none"> <li>• yes: yes</li> <li>• no: no</li> <li>• unknown: don't know</li> <li>• missing</li> </ul> |
| Respiratory disease     | Are you suffering from this disease? | 1. yes<br>2. no<br>3. don't know | 1. yes<br>2. no<br>3. don't know<br>9. missing | <ul style="list-style-type: none"> <li>• yes: yes</li> <li>• no: no</li> <li>• unknown: don't know</li> <li>• missing</li> </ul> |
| Cancer                  | Are you suffering from this disease? | 1. yes<br>2. no<br>3. don't know | 1. yes<br>2. no<br>3. don't know<br>9. missing | <ul style="list-style-type: none"> <li>• yes: yes</li> <li>• no: no</li> <li>• unknown: don't know</li> <li>• missing</li> </ul> |

|                   |                                         |                                                                                       |                                                                                       |                                                                                                                                                                                     |
|-------------------|-----------------------------------------|---------------------------------------------------------------------------------------|---------------------------------------------------------------------------------------|-------------------------------------------------------------------------------------------------------------------------------------------------------------------------------------|
| Self-rated health | How do you rate your health at present? | 1. very good<br>2. good<br>3. so so<br>4. bad<br>5. very bad<br>8. not able to answer | 1. very good<br>2. good<br>3. so so<br>4. bad<br>5. very bad<br>8. not able to answer | <ul style="list-style-type: none"><li>• good: very good, good</li><li>• fair: so so</li><li>• poor: bad, very bad</li><li>• unknown: not able to answer</li><li>• missing</li></ul> |
|-------------------|-----------------------------------------|---------------------------------------------------------------------------------------|---------------------------------------------------------------------------------------|-------------------------------------------------------------------------------------------------------------------------------------------------------------------------------------|

<sup>a</sup>The missing values for all the baseline variables analyzed in this research were less than 0.70%. Due to such low missing rates, we did not impute the missing values, and we deleted the cases with missing values in the statistical analyses.
