# Supplementary material
Source: HighWire-hosted journal article supplement (https://jech.bmj.com/content/77/5/277)
Supplement: inline-supplementary-material-4 [file inline-supplementary-material-4.pdf]

Table S3. Baseline characteristics (Table 1 continued)

| Variable            | All               | Social activity frequency |                               |                                        |                                      |                   | p for trend <sup>a</sup> |
|---------------------|-------------------|---------------------------|-------------------------------|----------------------------------------|--------------------------------------|-------------------|--------------------------|
|                     |                   | Never                     | Not monthly,<br>but sometimes | Not weekly,<br>but at least once/month | Not daily,<br>but at least once/week | Almost everyday   |                          |
| No. of subjects     | 28563             | 25406                     | 1379                          | 693                                    | 553                                  | 532               |                          |
| Education (years)   | 0.00 (0.00, 3.00) | 0.00 (0.00, 2.00)         | 2.00 (0.00, 6.00)             | 3.00 (0.00, 7.00)                      | 3.00 (0.00, 7.00)                    | 4.00 (0.00, 8.00) | <0.001                   |
| Marital status      |                   |                           |                               |                                        |                                      |                   |                          |
| In marriage         | 8568 (30.00%)     | 6871 (27.04%)             | 723 (52.43%)                  | 374 (53.97%)                           | 287 (51.90%)                         | 313 (58.83%)      | <0.001                   |
| Not in marriage     | 19995 (70.00%)    | 18535 (72.96%)            | 656 (47.57%)                  | 319 (46.03%)                           | 266 (48.10%)                         | 219 (41.17%)      |                          |
| Residence           |                   |                           |                               |                                        |                                      |                   |                          |
| Rural               | 17524 (61.35%)    | 16139 (63.52%)            | 686 (49.75%)                  | 280 (40.40%)                           | 231 (41.77%)                         | 188 (35.34%)      | <0.001                   |
| Urban               | 11039 (38.65%)    | 9267 (36.48%)             | 693 (50.25%)                  | 413 (59.60%)                           | 322 (58.23%)                         | 344 (64.66%)      |                          |
| Co-residence        |                   |                           |                               |                                        |                                      |                   |                          |
| With family members | 23774 (83.23%)    | 21180 (83.37%)            | 1145 (83.03%)                 | 552 (79.65%)                           | 448 (81.01%)                         | 449 (84.40%)      | <0.001                   |
| Alone               | 4062 (14.22%)     | 3659 (14.40%)             | 162 (11.75%)                  | 106 (15.30%)                           | 67 (12.12%)                          | 68 (12.78%)       |                          |
| In an institution   | 727 (2.55%)       | 567 (2.23%)               | 72 (5.22%)                    | 35 (5.05%)                             | 38 (6.87%)                           | 15 (2.82%)        |                          |
| Household income    |                   |                           |                               |                                        |                                      |                   |                          |
| Rich                | 4500 (15.75%)     | 3693 (14.54%)             | 297 (21.54%)                  | 184 (26.55%)                           | 177 (32.01%)                         | 149 (28.01%)      | <0.001                   |
| Fair                | 19210 (67.25%)    | 17137 (67.45%)            | 959 (69.54%)                  | 449 (64.79%)                           | 332 (60.04%)                         | 333 (62.59%)      |                          |
| Poor                | 4853 (16.99%)     | 4576 (18.01%)             | 123 (8.92%)                   | 60 (8.66%)                             | 44 (7.96%)                           | 50 (9.40%)        |                          |
| Fresh fruit         |                   |                           |                               |                                        |                                      |                   |                          |
| Often               | 10007 (35.03%)    | 8432 (33.19%)             | 655 (47.50%)                  | 372 (53.68%)                           | 265 (47.92%)                         | 283 (53.20%)      | <0.001                   |
| Occasionally        | 10829 (37.91%)    | 9749 (38.37%)             | 519 (37.64%)                  | 236 (34.05%)                           | 178 (32.19%)                         | 147 (27.63%)      |                          |
| Never               | 7727 (27.05%)     | 7225 (28.44%)             | 205 (14.87%)                  | 85 (12.27%)                            | 110 (19.89%)                         | 102 (19.17%)      |                          |
| Fresh vegetable     |                   |                           |                               |                                        |                                      |                   |                          |

|                          |                |                |               |              |              |              |        |
|--------------------------|----------------|----------------|---------------|--------------|--------------|--------------|--------|
| Often                    | 24562 (85.99%) | 21706 (85.44%) | 1242 (90.07%) | 626 (90.33%) | 505 (91.32%) | 483 (90.79%) |        |
| Occasionally             | 2945 (10.31%)  | 2702 (10.64%)  | 108 (7.83%)   | 59 (8.51%)   | 37 (6.69%)   | 39 (7.33%)   | <0.001 |
| Never                    | 1056 (3.70%)   | 998 (3.93%)    | 29 (2.10%)    | 8 (1.15%)    | 11 (1.99%)   | 10 (1.88%)   |        |
| Lifestyle factors        |                |                |               |              |              |              |        |
| Current smoking          | 5167 (18.09%)  | 4347 (17.11%)  | 341 (24.73%)  | 195 (28.14%) | 143 (25.86%) | 141 (26.50%) | <0.001 |
| Current drinking         | 5638 (19.74%)  | 4798 (18.89%)  | 362 (26.25%)  | 194 (27.99%) | 135 (24.41%) | 149 (28.01%) | <0.001 |
| Current regular exercise | 7760 (27.17%)  | 5950 (23.42%)  | 720 (52.21%)  | 417 (60.17%) | 324 (58.59%) | 349 (65.60%) | <0.001 |

Values are median (IQR) or n (%).

<sup>a</sup> Across the groups of social activity frequency. For continuous variables, p-value for trend was computed from the Pearson test when row-variable was normal distribution and from the Spearman test when it was non-normal distribution. When the row-variable was categorical, p-value for trend was computed from Mantel-Haenszel test of trend.
