# Supplementary material
Source: HighWire-hosted journal article supplement (https://jech.bmj.com/content/77/5/277)
Supplement: inline-supplementary-material-5 [file inline-supplementary-material-5.pdf]

Table S4. Adjusted time ratios of other covariates

| Variable          | Changes                         | TR (95% CI), p              |                             |                             |
|-------------------|---------------------------------|-----------------------------|-----------------------------|-----------------------------|
|                   |                                 | 0 - end                     | 0 - 5 years                 | >= 5 years - end            |
| Sex               | Female vs. male                 | 3.327 (2.993-3.697), <0.001 | 1.834 (1.710-1.967), <0.001 | 3.056 (2.483-3.762), <0.001 |
| Age (years)       | per 1-year increment            | 0.781 (0.777-0.785), <0.001 | 0.878 (0.875-0.881), <0.001 | 0.787 (0.780-0.794), <0.001 |
| Education (years) | per 1-year increment            | 1.029 (1.013-1.047), 0.001  | 1.009 (0.998-1.020), 0.117  | 1.041 (1.011-1.072), 0.008  |
| Marital status    | Not in marriage vs. in marriage | 0.401 (0.353-0.456), <0.001 | 0.599 (0.550-0.651), <0.001 | 0.592 (0.477-0.733), <0.001 |
| Residence         | Urban vs. rural                 | 0.985 (0.898-1.080), 0.745  | 0.970 (0.913-1.031), 0.323  | 1.094 (0.913-1.310), 0.329  |
| Co-residence      | With family members             | 1 (ref)                     | 1 (ref)                     | 1 (ref)                     |
|                   | Alone                           | 1.253 (1.103-1.423), 0.001  | 1.321 (1.214-1.437), <0.001 | 1.017 (0.798-1.295), 0.893  |
|                   | In an institution               | 0.368 (0.284-0.477), <0.001 | 0.570 (0.481-0.675), <0.001 | 0.432 (0.241-0.776), 0.005  |
| Household income  | Rich                            | 1 (ref)                     | 1 (ref)                     | 1 (ref)                     |
|                   | Fair                            | 1.038 (0.918-1.173), 0.554  | 1.023 (0.943-1.109), 0.591  | 1.056 (0.837-1.331), 0.648  |
|                   | Poor                            | 1.142 (0.976-1.336), 0.097  | 1.129 (1.018-1.252), 0.022  | 1.067 (0.788-1.447), 0.674  |
| Fresh fruit       | Often                           | 1 (ref)                     | 1 (ref)                     | 1 (ref)                     |
|                   | Occasionally                    | 0.993 (0.894-1.103), 0.892  | 1.023 (0.954-1.097), 0.518  | 0.835 (0.685-1.019), 0.077  |
|                   | Never                           | 0.798 (0.710-0.896), <0.001 | 0.947 (0.877-1.023), 0.167  | 0.627 (0.498-0.788), <0.001 |
| Fresh vegetable   | Often                           | 1 (ref)                     | 1 (ref)                     | 1 (ref)                     |
|                   | Occasionally                    | 0.931 (0.811-1.069), 0.312  | 0.868 (0.793-0.951), 0.002  | 1.353 (1.011-1.811), 0.042  |
|                   | Never                           | 0.722 (0.583-0.892), 0.003  | 0.725 (0.631-0.833), <0.001 | 0.893 (0.510-1.566), 0.694  |
| Current smoking   | Yes vs. no                      | 0.861 (0.758-0.977), 0.020  | 0.965 (0.887-1.05), 0.409   | 0.734 (0.588-0.916), 0.006  |
| Current drinking  | Yes vs. no                      | 1.245 (1.110-1.396), <0.001 | 1.169 (1.083-1.261), <0.001 | 0.972 (0.787-1.201), 0.795  |

|                          |            |                              |                             |                             |
|--------------------------|------------|------------------------------|-----------------------------|-----------------------------|
| Current regular exercise | Yes vs. no | 1.369 (1.231-1.522), <0.001  | 1.392 (1.297-1.494), <0.001 | 0.983 (0.815-1.186), 0.859  |
| Hypertension             | Yes        | 1 (ref)                      | 1 (ref)                     | 1 (ref)                     |
|                          | No         | 0.978 (0.864-1.107), 0.723   | 0.870 (0.802-0.945), 0.001  | 1.242 (0.992-1.555), 0.058  |
|                          | Unknown    | 1.050 (0.746-1.479), 0.779   | 0.918 (0.732-1.151), 0.458  | 1.292 (0.680-2.457), 0.434  |
| Diabetes                 | Yes        | 1 (ref)                      | 1 (ref)                     | 1 (ref)                     |
|                          | No         | 2.796 (2.009-3.892), <0.001  | 1.891 (1.531-2.336), <0.001 | 1.300 (0.671-2.518), 0.436  |
|                          | Unknown    | 3.554 (2.103-6.007), <0.001  | 1.901 (1.349-2.678), <0.001 | 1.632 (0.572-4.660), 0.360  |
| Heart disease            | Yes        | 1 (ref)                      | 1 (ref)                     | 1 (ref)                     |
|                          | No         | 1.146 (0.966-1.359), 0.118   | 1.037 (0.927-1.161), 0.522  | 1.231 (0.892-1.698), 0.206  |
|                          | Unknown    | 1.120 (0.711-1.765), 0.625   | 0.960 (0.711-1.296), 0.789  | 1.396 (0.596-3.265), 0.442  |
| Cerebrovascular disease  | Yes        | 1 (ref)                      | 1 (ref)                     | 1 (ref)                     |
|                          | No         | 2.383 (1.949-2.914), <0.001  | 1.558 (1.366-1.777), <0.001 | 2.455 (1.635-3.686), <0.001 |
|                          | Unknown    | 2.273 (1.389-3.718), 0.001   | 1.450 (1.047-2.009), 0.025  | 3.558 (1.283-9.871), 0.015  |
| Respiratory disease      | Yes        | 1 (ref)                      | 1 (ref)                     | 1 (ref)                     |
|                          | No         | 1.621 (1.418-1.853), <0.001  | 1.254 (1.148-1.370), <0.001 | 2.113 (1.625-2.748), <0.001 |
|                          | Unknown    | 1.116 (0.732-1.702), 0.610   | 1.099 (0.831-1.453), 0.507  | 1.313 (0.575-2.996), 0.518  |
| Cancer                   | Yes        | 1 (ref)                      | 1 (ref)                     | 1 (ref)                     |
|                          | No         | 4.858 (2.358-10.013), <0.001 | 2.583 (1.619-4.122), <0.001 | 5.976 (0.997-35.817), 0.050 |
|                          | Unknown    | 5.197 (2.371-11.393), <0.001 | 2.864 (1.718-4.772), <0.001 | 3.745 (0.572-24.518), 0.168 |
| Self-rated health        |            |                              |                             |                             |

---

|                    | 1 (ref)                     | 1 (ref)                     | 1 (ref)                     |
|--------------------|-----------------------------|-----------------------------|-----------------------------|
| Good               |                             |                             |                             |
| Fair               | 0.638 (0.575-0.708), <0.001 | 0.741 (0.692-0.794), <0.001 | 0.798 (0.66-0.964), 0.019   |
| Poor               | 0.333 (0.290-0.382), <0.001 | 0.490 (0.447-0.536), <0.001 | 0.420 (0.318-0.553), <0.001 |
| Not able to answer | 0.417 (0.363-0.479), <0.001 | 0.442 (0.403-0.484), <0.001 | 0.711 (0.471-1.073), 0.104  |

---

Abbreviations: CI, confidence interval; TR, time ratio.
