# Supplementary material
Source: HighWire-hosted journal article supplement (https://jech.bmj.com/content/77/5/277)
Supplement: inline-supplementary-material-6 [file inline-supplementary-material-6.pdf]

| Subgroup                           | No social activity | Social activity | TR (95% CI)      | interaction |        |
|------------------------------------|--------------------|-----------------|------------------|-------------|--------|
| Sex                                |                    |                 |                  |             |        |
| Male                               | 7366 (74.25%)      | 1123 (58.07%)   | 1.74 (1.39–2.18) |             | <0.001 |
| Female                             | 12051 (77.82%)     | 621 (50.78%)    | 2.63 (2.04–3.38) |             | <0.001 |
| Age (years)                        |                    |                 |                  |             |        |
| <80                                | 2354 (42.16%)      | 537 (34.67%)    | 1.59 (0.95–2.66) |             | 0.078  |
| ≥80, <100                          | 11035 (82.55%)     | 1022 (73.42%)   | 2.45 (2.00–3.00) |             | <0.001 |
| ≥100                               | 6028 (93.38%)      | 185 (85.65%)    | 1.78 (1.35–2.34) |             | <0.001 |
| Education                          |                    |                 |                  |             |        |
| No                                 | 14114 (80.63%)     | 726 (62.91%)    | 2.09 (1.66–2.63) |             | <0.001 |
| Yes                                | 5303 (67.12%)      | 1018 (50.82%)   | 1.85 (1.44–2.38) |             | <0.001 |
| Marital status                     |                    |                 |                  |             |        |
| Not in marriage                    | 15501 (83.63%)     | 1001 (68.56%)   | 2.30 (1.91–2.78) |             | <0.001 |
| In marriage                        | 3916 (56.99%)      | 743 (43.78%)    | 1.41 (1.00–1.99) |             | 0.051  |
| Residence                          |                    |                 |                  |             |        |
| Rural                              | 12535 (77.67%)     | 840 (60.65%)    | 1.84 (1.46–2.33) |             | <0.001 |
| Urban                              | 6882 (74.26%)      | 904 (51.02%)    | 2.30 (1.82–2.91) |             | <0.001 |
| Co-residence                       |                    |                 |                  |             |        |
| With family members                | 16225 (76.61%)     | 1367 (52.70%)   | 2.19 (1.82–2.64) |             | <0.001 |
| Alone/in an institution            | 3192 (75.53%)      | 377 (66.96%)    | 1.52 (1.06–2.17) |             | 0.022  |
| Household income                   |                    |                 |                  |             |        |
| Fair/poor                          | 17107 (76.80%)     | 1432 (53.25%)   | 2.14 (1.79–2.57) |             | <0.001 |
| Rich                               | 2310 (73.78%)      | 312 (66.67%)    | 1.72 (1.16–2.55) |             | 0.007  |
| Fresh fruit/vegetable <sup>a</sup> |                    |                 |                  |             |        |
| Occasionally/never                 | 2733 (82.24%)      | 162 (63.04%)    | 1.85 (1.17–2.95) |             | 0.009  |
| Often                              | 16684 (75.55%)     | 1582 (54.55%)   | 2.12 (1.78–2.53) |             | <0.001 |
| Healthy lifestyle <sup>b</sup>     |                    |                 |                  |             |        |
| No                                 | 16733 (77.59%)     | 1216 (57.79%)   | 2.08 (1.72–2.52) |             | <0.001 |
| Yes                                | 2684 (69.90%)      | 528 (50.14%)    | 2.29 (1.62–3.22) |             | <0.001 |
| Comorbidity <sup>c</sup>           |                    |                 |                  |             |        |
| No                                 | 12355 (76.92%)     | 1049 (57.10%)   | 1.99 (1.61–2.46) |             | <0.001 |
| Yes                                | 5602 (74.24%)      | 570 (50.89%)    | 2.47 (1.84–3.32) |             | <0.001 |
| Self-rated health <sup>d</sup>     |                    |                 |                  |             |        |
| Fair/poor                          | 12676 (76.95%)     | 1149 (56.10%)   | 2.38 (1.94–2.92) |             | <0.001 |
| Good                               | 5281 (74.01%)      | 470 (51.71%)    | 2.00 (1.44–2.76) |             | <0.001 |

1.0

2.0

&lt;- Favors no social activity      Favors social activity -&gt;
