# Supplementary material
Source: HighWire-hosted journal article supplement (https://jech.bmj.com/content/77/5/277)
Supplement: inline-supplementary-material-7 [file inline-supplementary-material-7.pdf]

| Subgroup                           | No social activity | Social activity | TR (95% CI)      | Interaction |        |        |
|------------------------------------|--------------------|-----------------|------------------|-------------|--------|--------|
| Sex                                |                    |                 |                  |             |        |        |
| Male                               | 5355 (53.98%)      | 648 (33.51%)    | 1.38 (1.19–1.60) |             | <0.001 | 0.005  |
| Female                             | 9371 (60.52%)      | 354 (28.95%)    | 1.95 (1.64–2.32) |             | <0.001 |        |
| Age (years)                        |                    |                 |                  |             |        |        |
| <80                                | 948 (16.98%)       | 196 (12.65%)    | 1.40 (0.99–1.97) |             | 0.057  | <0.001 |
| ≥80, <100                          | 8286 (61.99%)      | 651 (46.77%)    | 1.95 (1.66–2.28) |             | <0.001 |        |
| ≥100                               | 5492 (85.08%)      | 155 (71.76%)    | 1.73 (1.34–2.23) |             | <0.001 |        |
| Education                          |                    |                 |                  |             |        |        |
| No                                 | 10974 (62.69%)     | 442 (38.30%)    | 1.67 (1.42–1.96) |             | <0.001 | 0.872  |
| Yes                                | 3752 (47.49%)      | 560 (27.96%)    | 1.49 (1.27–1.76) |             | <0.001 |        |
| Marital status                     |                    |                 |                  |             |        |        |
| Not in marriage                    | 12397 (66.88%)     | 642 (43.97%)    | 1.79 (1.56–2.05) |             | <0.001 | 0.046  |
| In marriage                        | 2329 (33.90%)      | 360 (21.21%)    | 1.27 (1.01–1.58) |             | 0.036  |        |
| Residence                          |                    |                 |                  |             |        |        |
| Rural                              | 9386 (58.16%)      | 464 (33.50%)    | 1.56 (1.33–1.84) |             | <0.001 | 0.497  |
| Urban                              | 5340 (57.62%)      | 538 (30.36%)    | 1.61 (1.38–1.88) |             | <0.001 |        |
| Co-residence                       |                    |                 |                  |             |        |        |
| With family members                | 12355 (58.33%)     | 762 (29.38%)    | 1.62 (1.43–1.84) |             | <0.001 | 0.047  |
| Alone/in an institution            | 2371 (56.11%)      | 240 (42.63%)    | 1.37 (1.07–1.76) |             | 0.012  |        |
| Household income                   |                    |                 |                  |             |        |        |
| Fair/poor                          | 13002 (58.37%)     | 804 (29.90%)    | 1.62 (1.43–1.83) |             | <0.001 | 0.472  |
| Rich                               | 1724 (55.06%)      | 198 (42.31%)    | 1.46 (1.11–1.91) |             | 0.007  |        |
| Fresh fruit/vegetable <sup>a</sup> |                    |                 |                  |             |        |        |
| Occasionally/never                 | 2224 (66.93%)      | 114 (44.36%)    | 1.50 (1.10–2.05) |             | 0.011  | 0.367  |
| Often                              | 12502 (56.61%)     | 888 (30.62%)    | 1.62 (1.44–1.82) |             | <0.001 |        |
| Healthy lifestyle <sup>b</sup>     |                    |                 |                  |             |        |        |
| No                                 | 12847 (59.57%)     | 713 (33.89%)    | 1.59 (1.39–1.80) |             | <0.001 | 0.367  |
| Yes                                | 1879 (48.93%)      | 289 (27.45%)    | 1.88 (1.49–2.35) |             | <0.001 |        |
| Comorbidity <sup>c</sup>           |                    |                 |                  |             |        |        |
| No                                 | 9411 (58.59%)      | 615 (33.48%)    | 1.50 (1.31–1.73) |             | <0.001 | 0.622  |
| Yes                                | 4212 (55.82%)      | 321 (28.66%)    | 1.73 (1.41–2.12) |             | <0.001 |        |
| Self-rated health <sup>d</sup>     |                    |                 |                  |             |        |        |
| Fair/poor                          | 9706 (58.92%)      | 649 (31.69%)    | 1.74 (1.51–2.00) |             | <0.001 | 0.032  |
| Good                               | 3917 (54.89%)      | 287 (31.57%)    | 1.50 (1.21–1.86) |             | <0.001 |        |

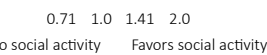

<- Favors no social activity      Favors social activity ->
