# Supplementary material
Source: HighWire-hosted journal article supplement (https://jech.bmj.com/content/77/5/277)
Supplement: inline-supplementary-material-8 [file inline-supplementary-material-8.pdf]

| Subgroup                           | social activity | social activity | TR (95% CI)         | interaction |
|------------------------------------|-----------------|-----------------|---------------------|-------------|
|                                    | Deaths (%)      |                 |                     |             |
| Sex                                |                 |                 |                     |             |
| Male                               | 2413 (54.65%)   | 73 (41.95%)     | 2.40 (1.18–4.91)    | 0.016       |
| Female                             | 2923 (54.76%)   | 24 (24.49%)     | 3.96 (1.37–11.44)   | 0.011       |
| Age (years)                        |                 |                 |                     |             |
| <80                                | 1704 (36.36%)   | 43 (25.29%)     | 3.37 (1.04–10.92)   | 0.043       |
| ≥80, <100                          | 3068 (70.38%)   | 52 (54.74%)     | 2.17 (1.09–4.32)    | 0.028       |
| ≥100                               | 564 (79.77%)    | 2 (28.57%)      | 14.44 (2.56–81.56)  | 0.003       |
| Education                          |                 |                 |                     |             |
| No                                 | 3396 (60.29%)   | 28 (41.79%)     | 2.08 (0.76–5.73)    | 0.154       |
| Yes                                | 1940 (47.09%)   | 69 (33.66%)     | 3.04 (1.42–6.48)    | 0.004       |
| Marital status                     |                 |                 |                     |             |
| Not in marriage                    | 3425 (65.41%)   | 38 (41.76%)     | 3.46 (1.54–7.79)    | 0.003       |
| In marriage                        | 1911 (42.31%)   | 59 (32.60%)     | 2.29 (0.94–5.57)    | 0.068       |
| Residence                          |                 |                 |                     |             |
| Rural                              | 3486 (55.71%)   | 39 (39.39%)     | 2.62 (1.02–6.76)    | 0.045       |
| Urban                              | 1850 (52.92%)   | 58 (33.53%)     | 2.67 (1.27–5.58)    | 0.009       |
| Co-residence                       |                 |                 |                     |             |
| With family members                | 4393 (53.96%)   | 82 (34.02%)     | 3.34 (1.75–6.35)    | <0.001      |
| Alone/in an institution            | 943 (58.50%)    | 15 (48.39%)     | 1.64 (0.41–6.49)    | 0.482       |
| Household income                   |                 |                 |                     |             |
| Fair/poor                          | 4649 (54.48%)   | 84 (34.43%)     | 3.18 (1.69–5.97)    | <0.001      |
| Rich                               | 687 (56.31%)    | 13 (46.43%)     | 1.64 (0.36–7.43)    | 0.520       |
| Fresh fruit/vegetable <sup>a</sup> |                 |                 |                     |             |
| Occasionally/never                 | 554 (60.09%)    | 3 (23.08%)      | 10.70 (0.66–174.58) | 0.096       |
| Often                              | 4782 (54.15%)   | 94 (36.29%)     | 2.78 (1.53–5.07)    | 0.001       |
| Healthy lifestyle <sup>b</sup>     |                 |                 |                     |             |
| No                                 | 4328 (55.42%)   | 61 (36.97%)     | 2.94 (1.42–6.11)    | 0.004       |
| Yes                                | 1008 (51.85%)   | 36 (33.64%)     | 2.57 (0.94–6.98)    | 0.065       |
| Comorbidity <sup>c</sup>           |                 |                 |                     |             |
| No                                 | 3320 (54.63%)   | 58 (38.67%)     | 3.16 (1.45–6.87)    | 0.004       |
| Yes                                | 1604 (52.95%)   | 35 (31.25%)     | 3.22 (1.27–8.19)    | 0.014       |
| Self-rated health <sup>d</sup>     |                 |                 |                     |             |
| Fair/poor                          | 3403 (54.60%)   | 67 (34.54%)     | 3.36 (1.67–6.74)    | 0.001       |
| Good                               | 1521 (52.94%)   | 26 (38.24%)     | 2.59 (0.81–8.25)    | 0.108       |

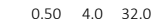

<- Favors no/intermittent social activity      Favors almost everyday social activity ->
